# Supplementary material for: Transcriptional licensing is required for Pyrin inflammasome activation in human macrophages and bypassed by mutations causing familial Mediterranean fever
Source: PubMed Central journal article supplement (PMC9671422; doi:10.1371/journal.pbio.3001351), 2022-11-07

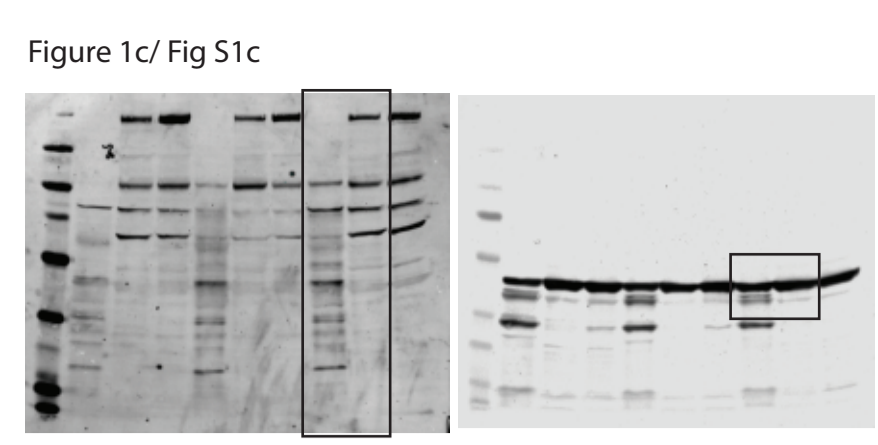

Figure 1c

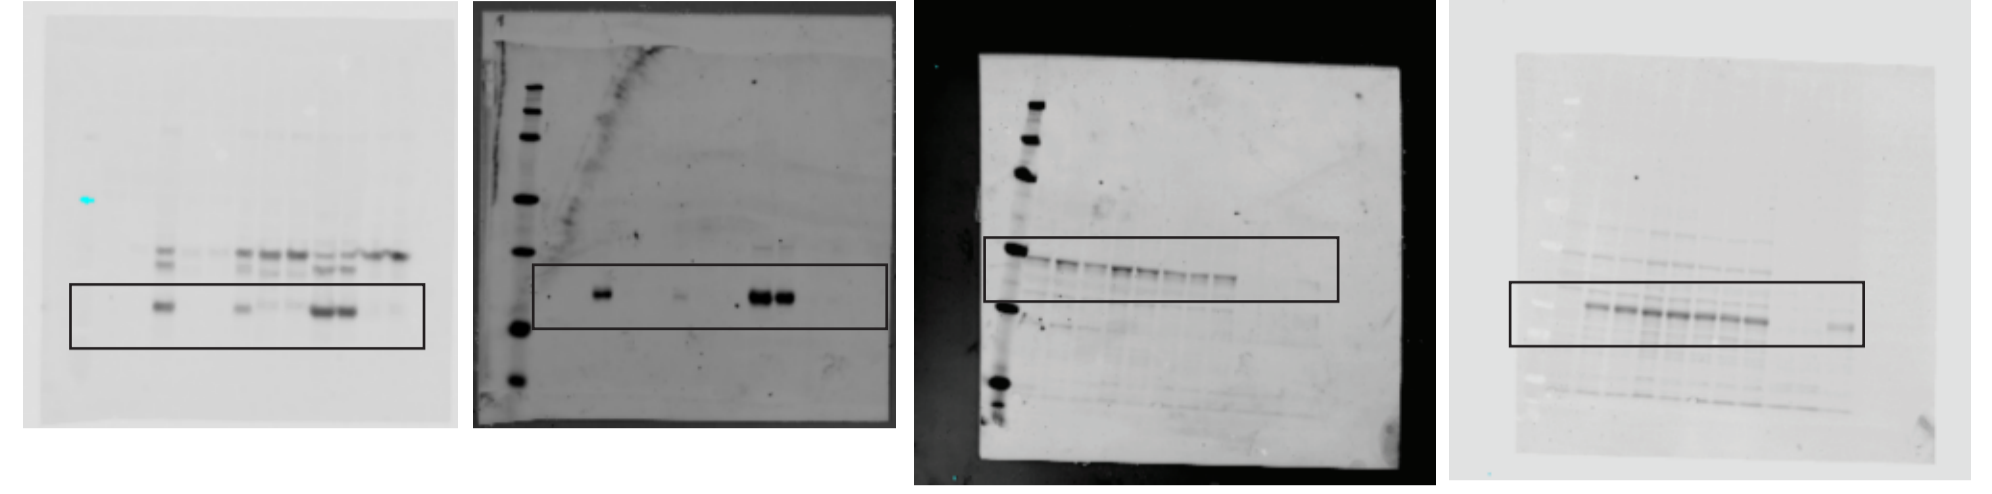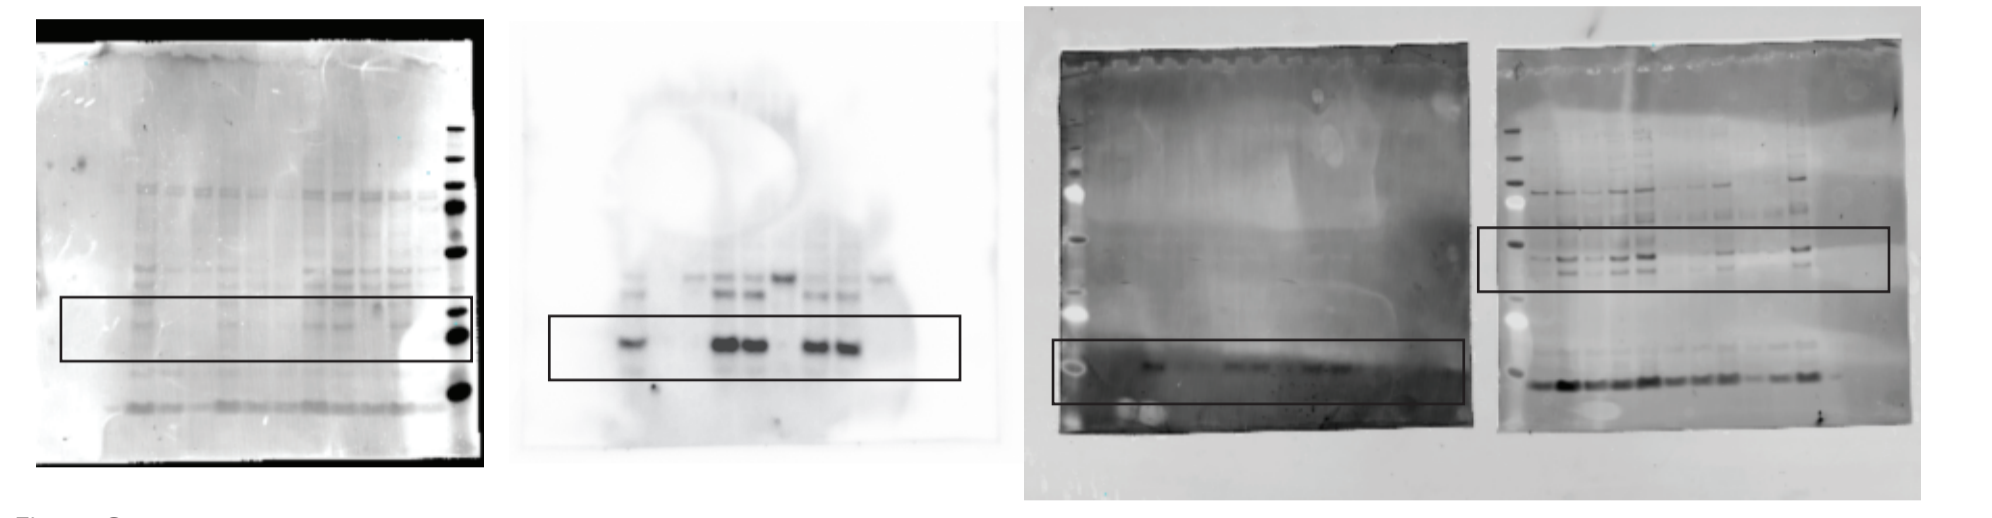

Figure S1a

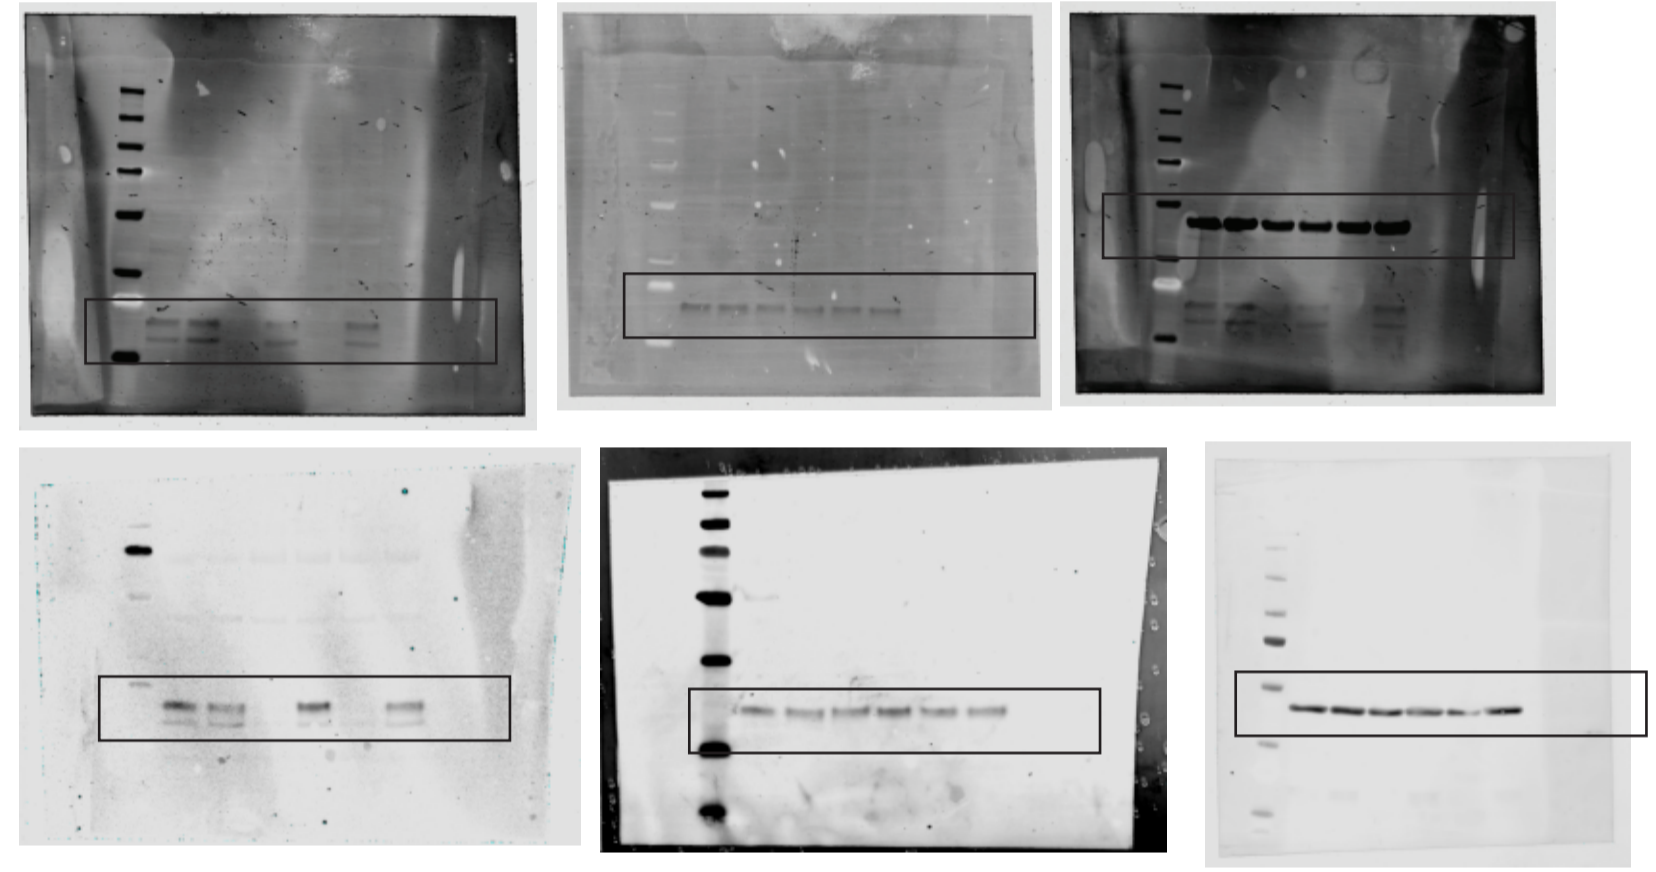

Figure S1b

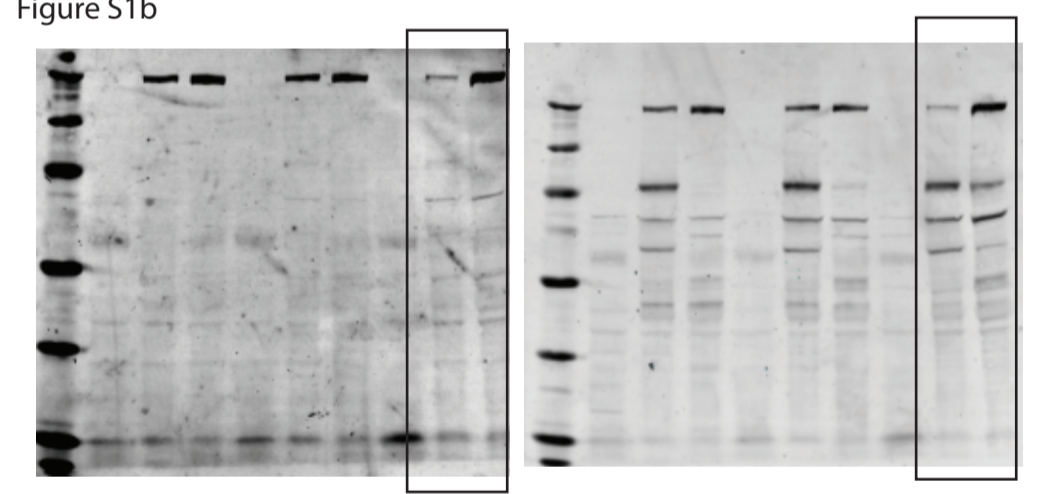

Fig S1c

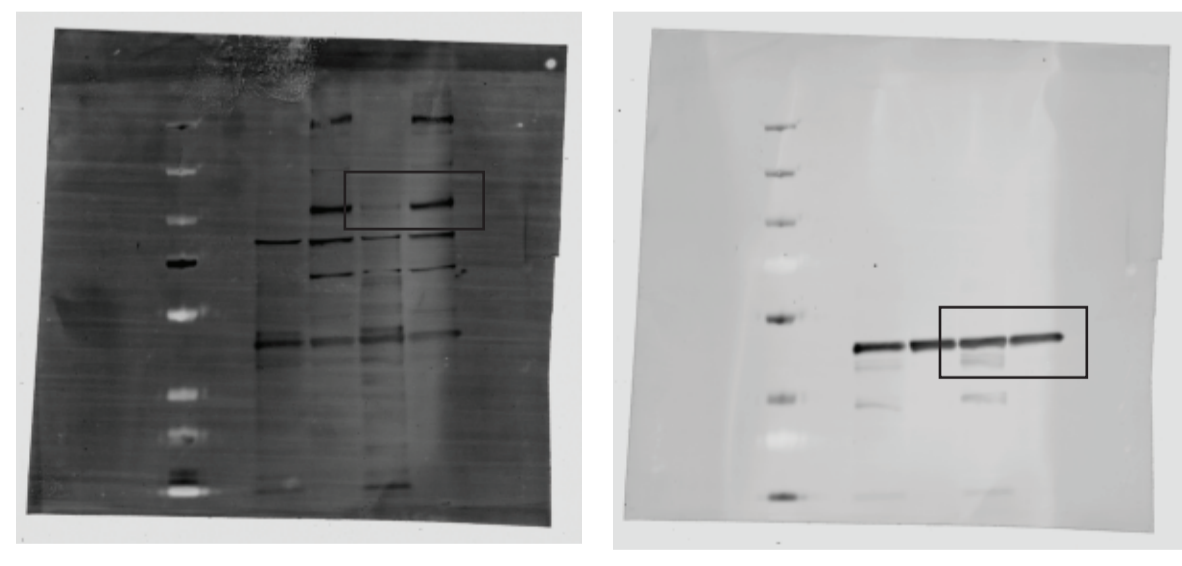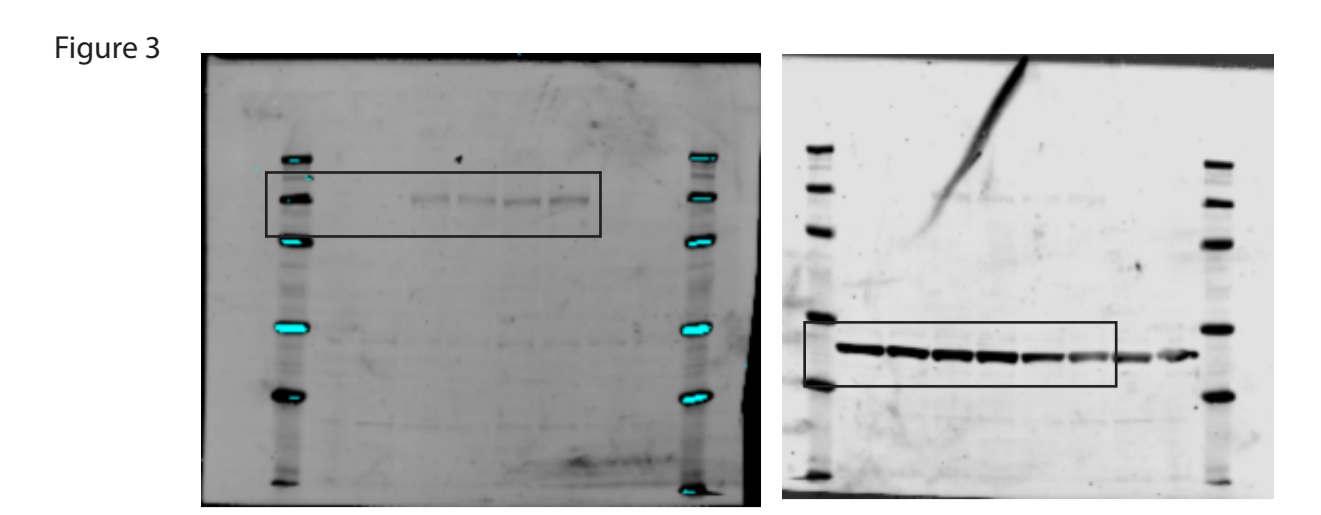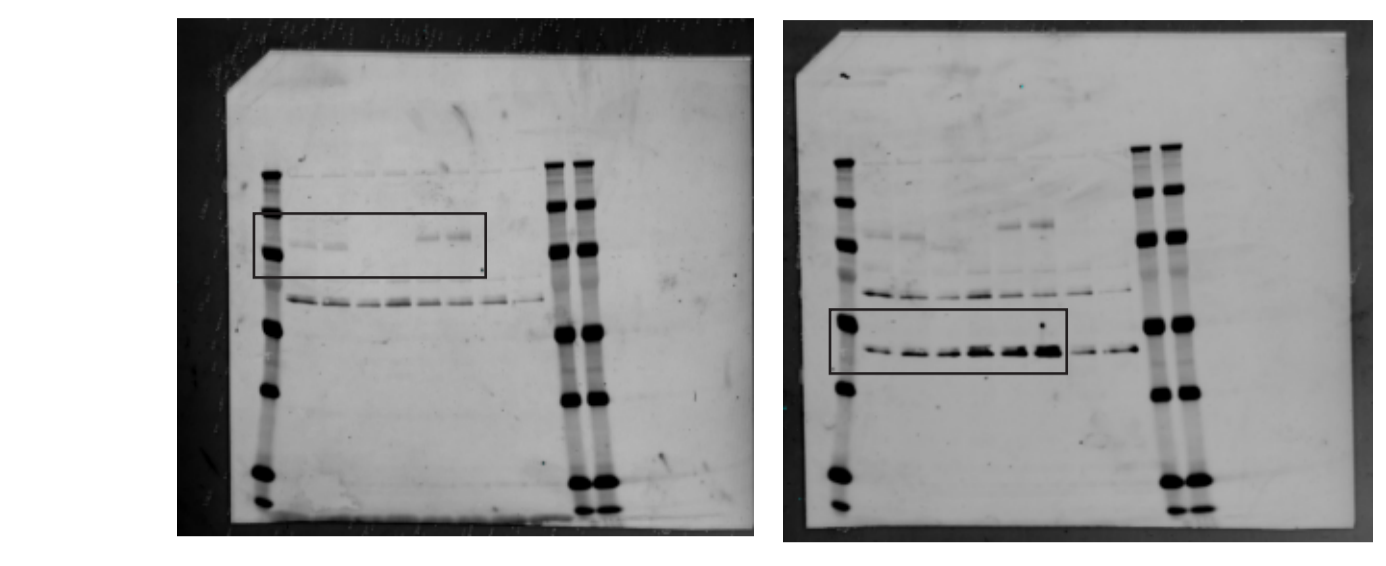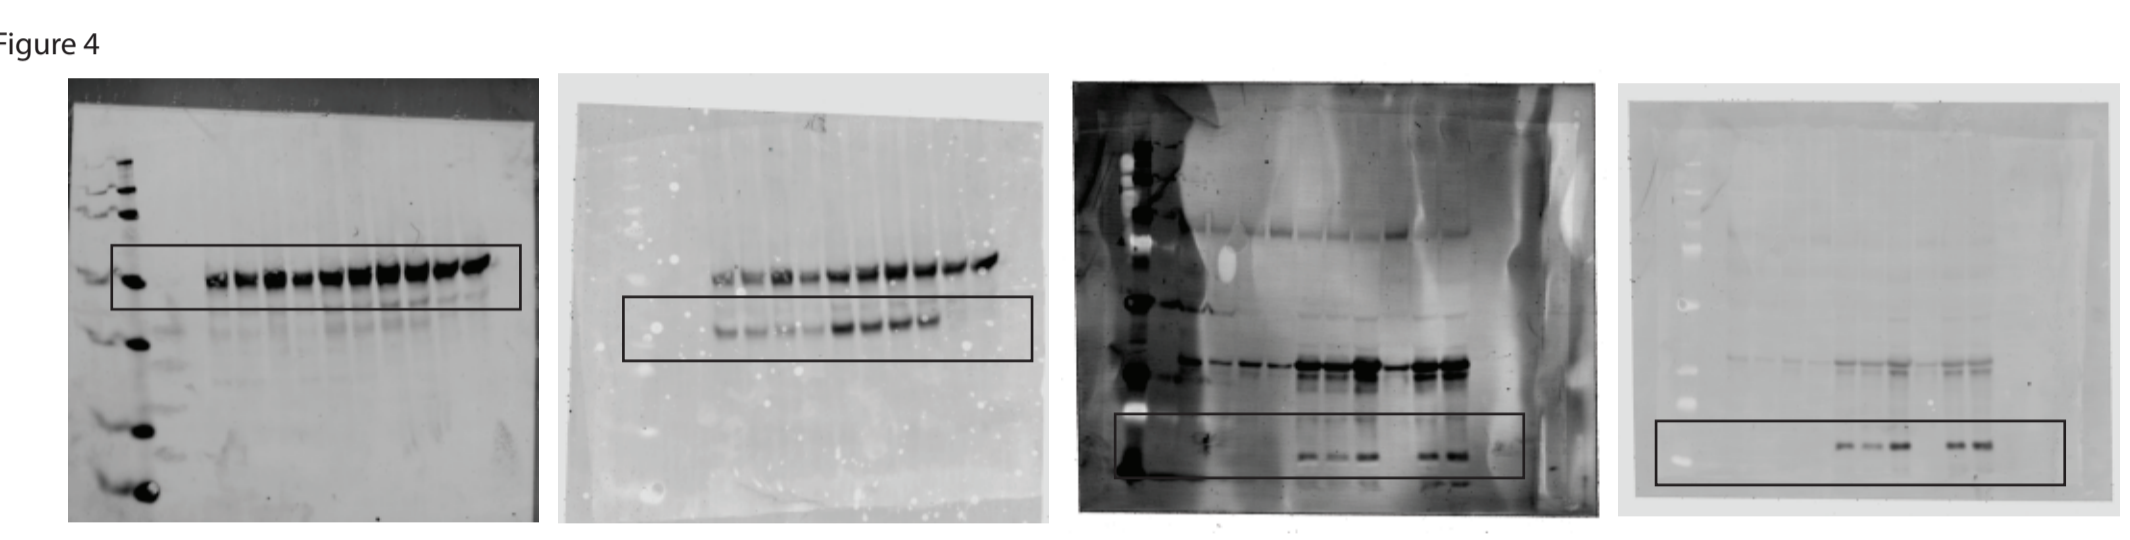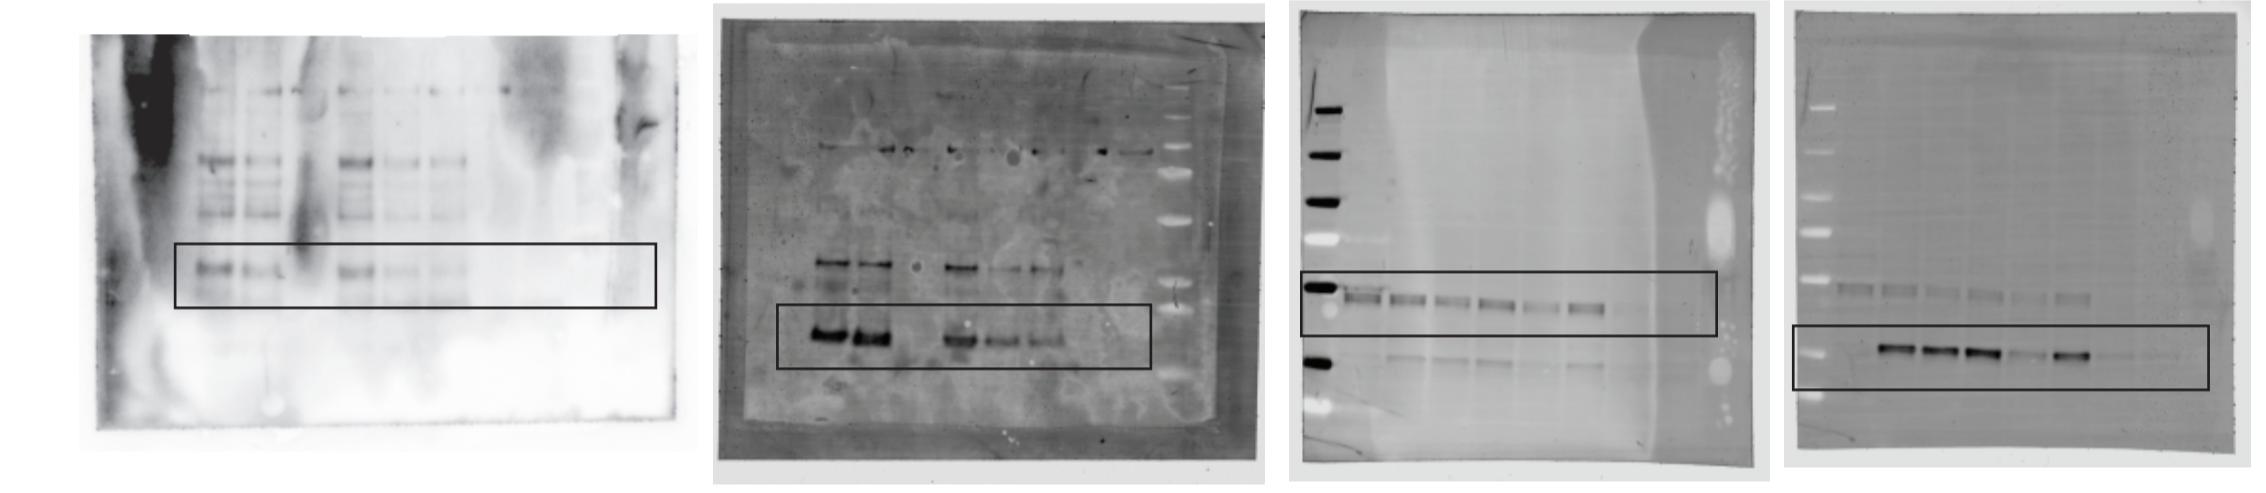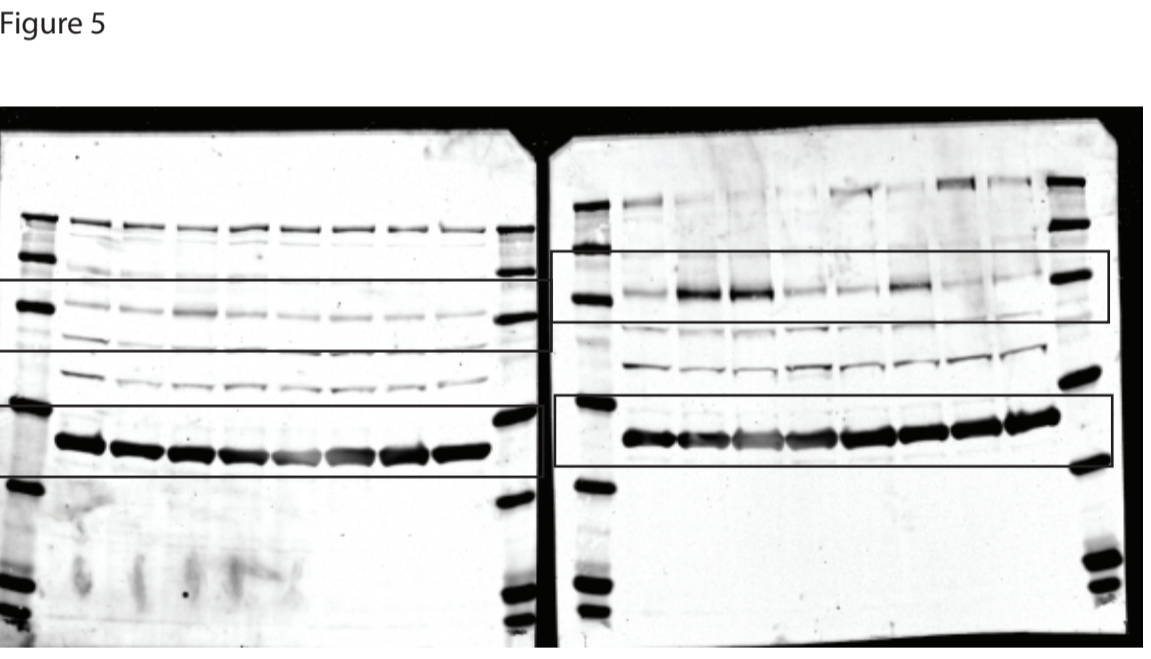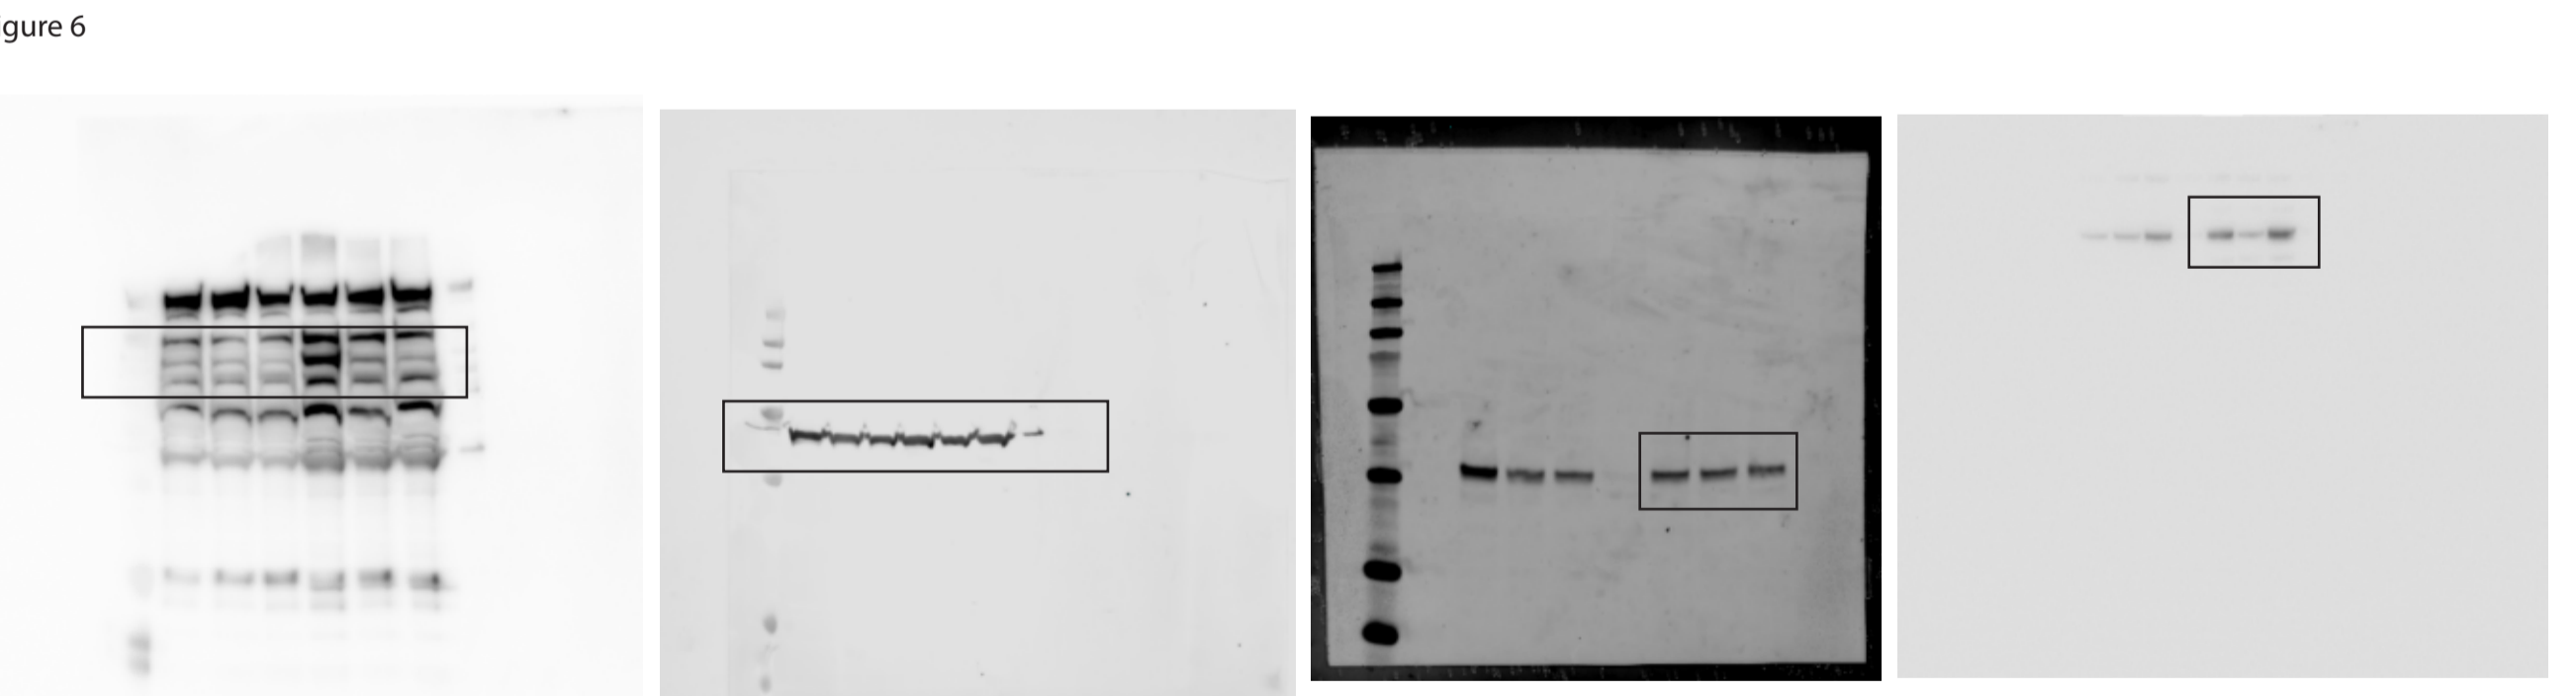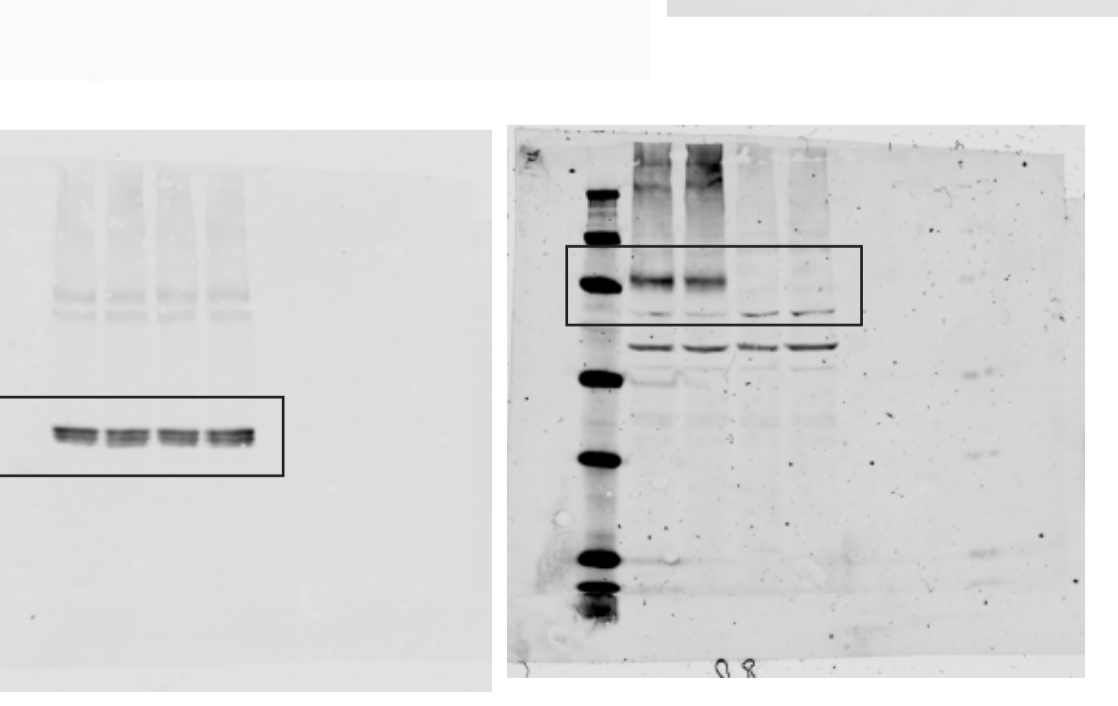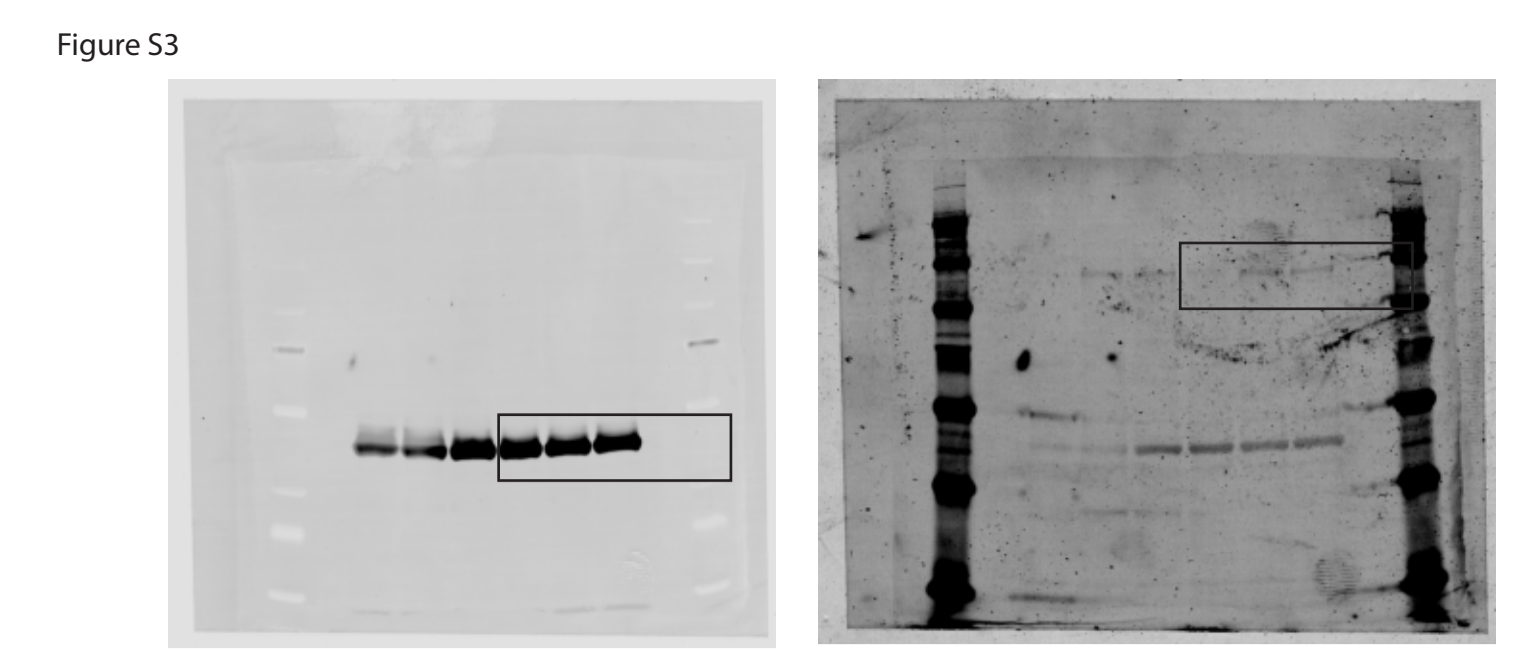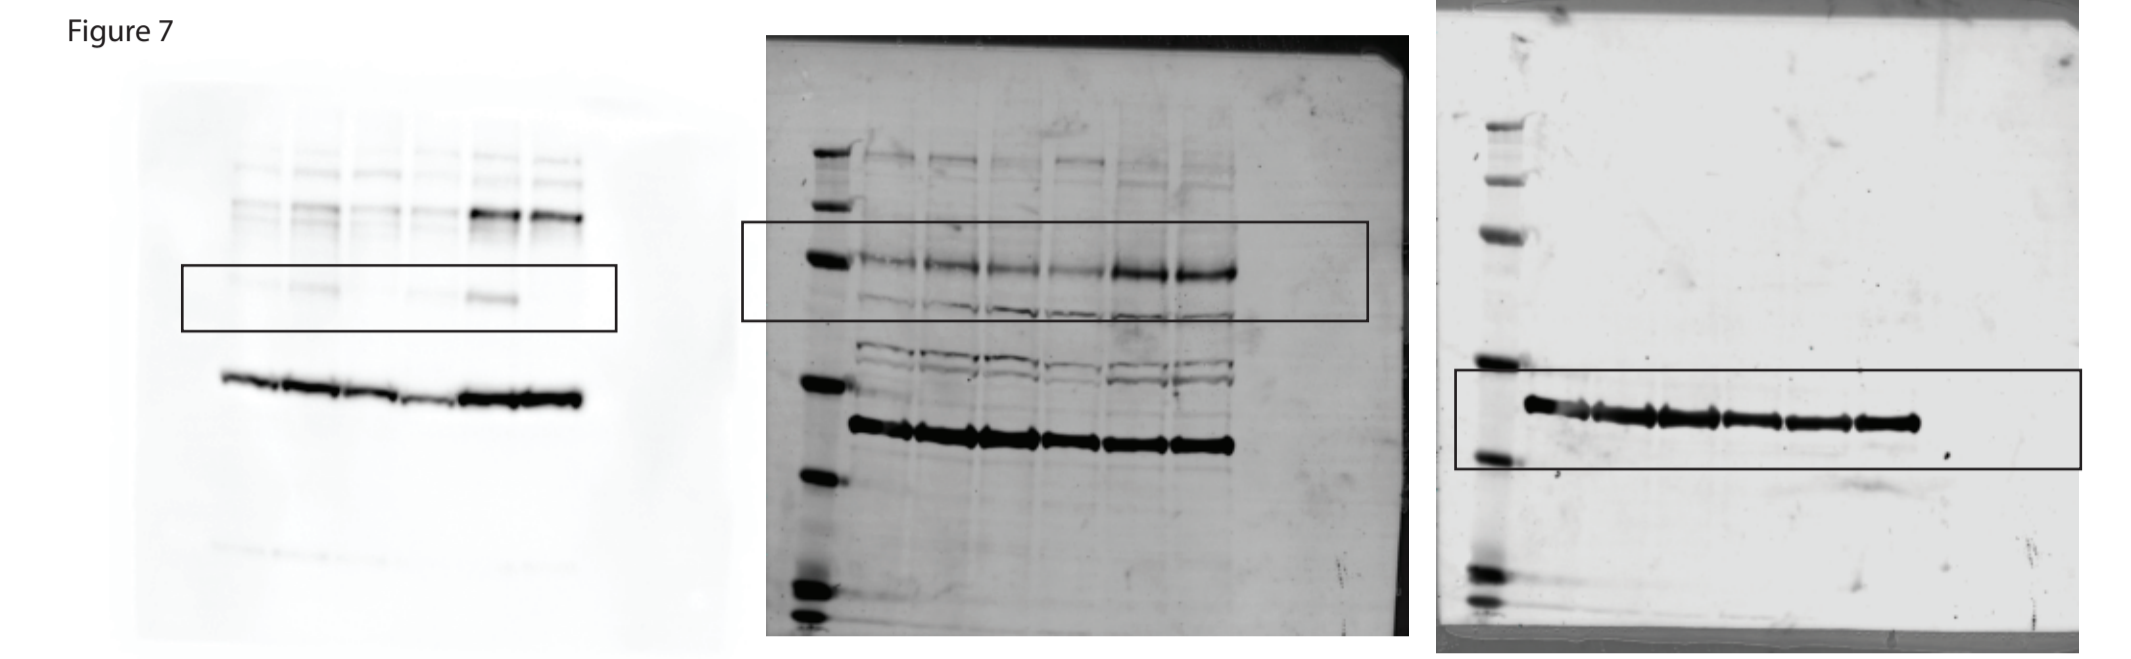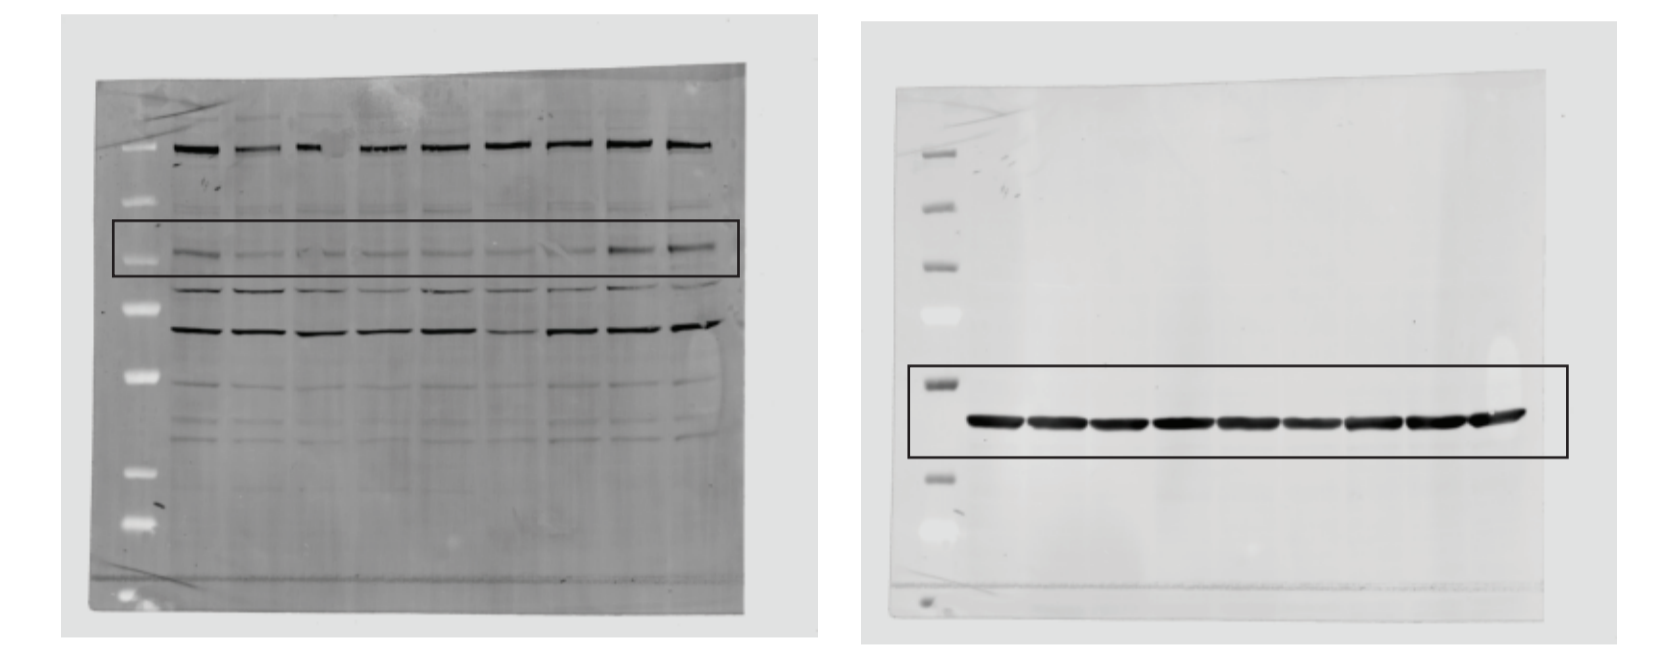

Supplement: pbio.3001351.s002.pdf [file pbio.3001351.s002.pdf]
