# Supplementary material for: Transcriptional licensing is required for Pyrin inflammasome activation in human macrophages and bypassed by mutations causing familial Mediterranean fever
Source: PubMed Central journal article supplement (PMC9671422; doi:10.1371/journal.pbio.3001351), 2022-11-07
Supplement: pbio.3001351.s004.pdf [file pbio.3001351.s004.pdf]

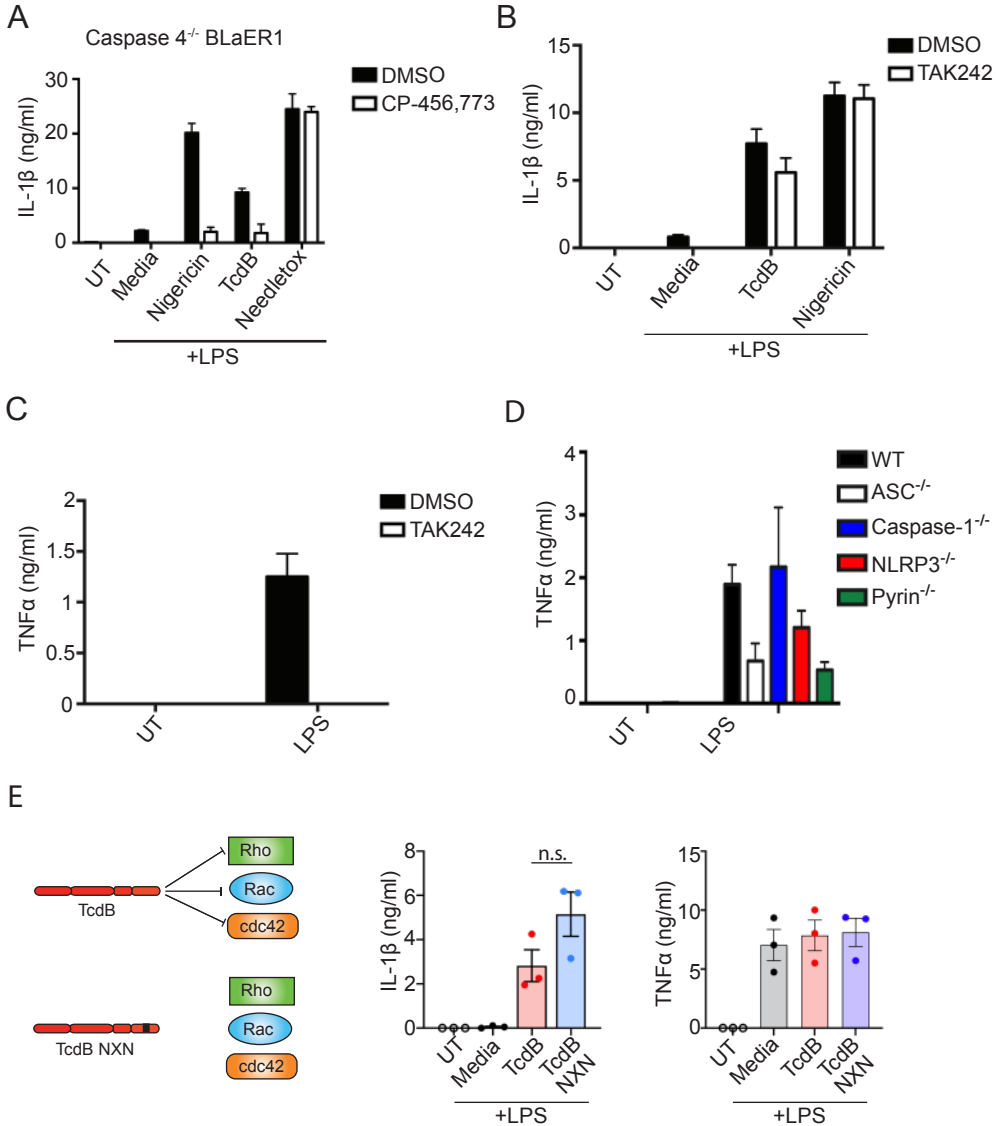

Fig. S2
